# Supplementary material for: Responding to Young People’s Health Risks in Primary Care: A Cluster Randomised Trial of Training Clinicians in Screening and Motivational Interviewing
Source: PubMed Central journal article supplement (PMC4589315; doi:10.1371/journal.pone.0137581), 2015-09-30

**S1 File. Outline of study phases**

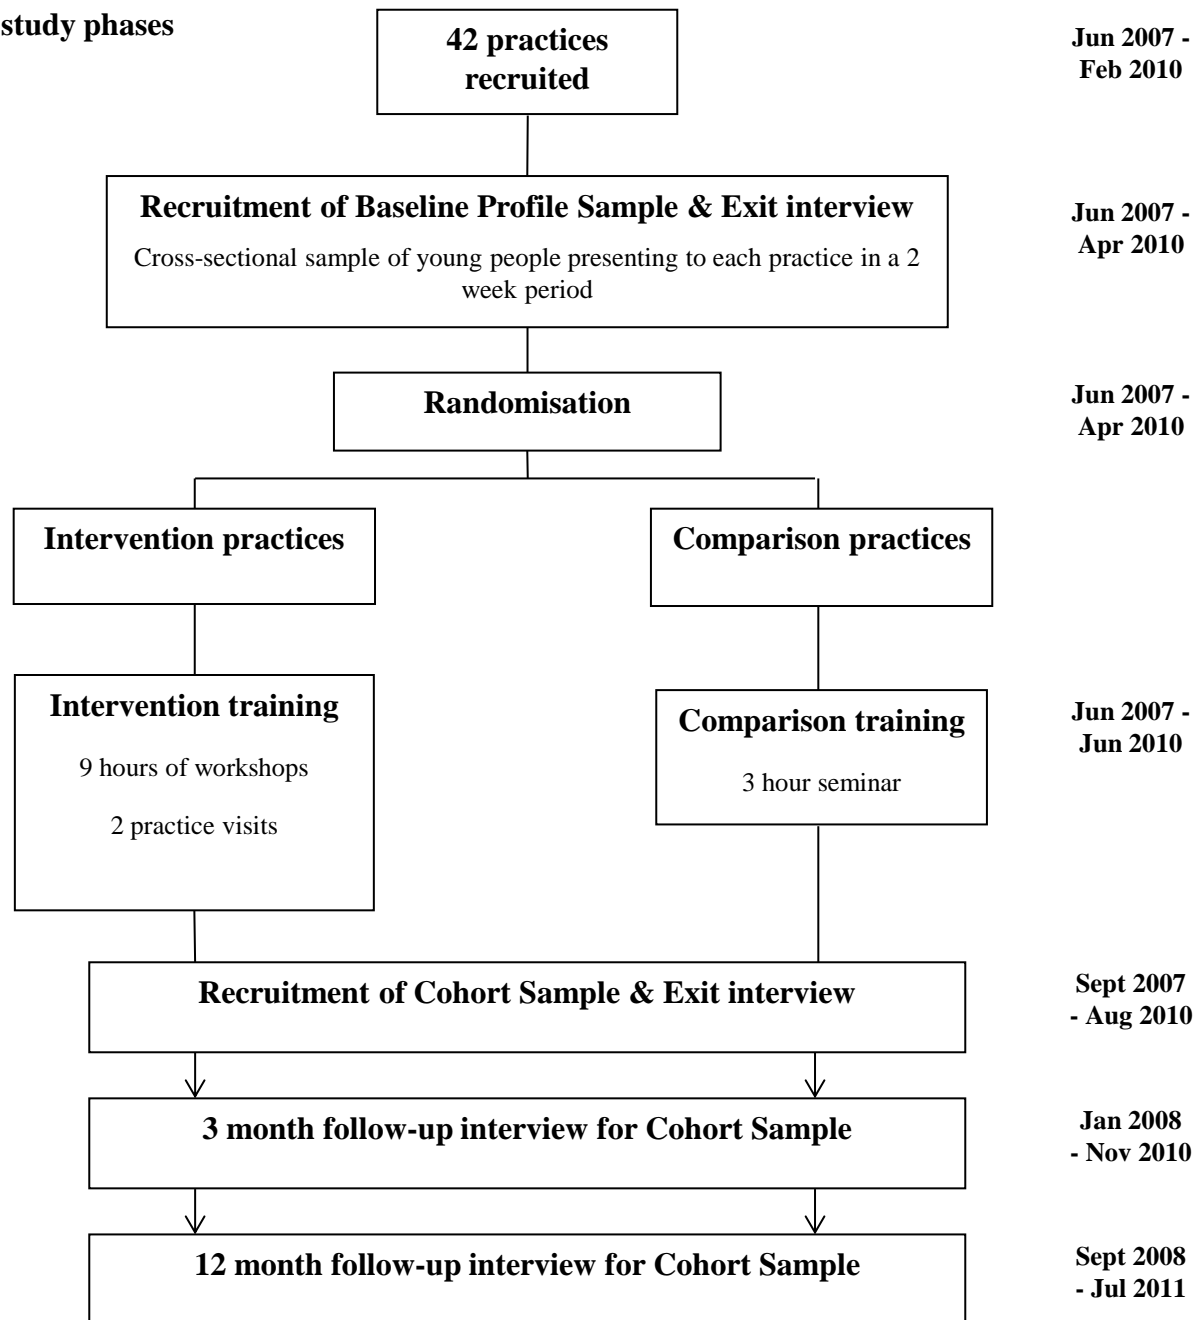

Supplement: pone.0137581.s002.pdf [file pone.0137581.s002.pdf]
